# Supplementary material for: Risk Assessment of Heavy Metals in Sediment Samples from the Mae Chaem River, Chiang Mai, Thailand
Source: MDPI journal article supplement (doi:10.3390/toxics11090780), 2023-09-14
Supplement: s1 [file s1]

SUPPORTING INFORMATION TO :

# Risk Assessment of heavy metal in surface sediment samples from the Mae Chaem River, Chiang Mai, Thailand

Sawaeng Kawichai <sup>1</sup>, Tippawan Prapamontol <sup>1\*</sup>, Teetawat Santijitpakdee <sup>1</sup> and Susira Bootdee <sup>2</sup>

<sup>1</sup> Research Institute for Health Sciences (RIHES), Chiang Mai University, Chiang Mai 50200, Thailand; sawaeng.k@gmail.com (S.K.); teetawat\_san@cmu.ac.th (T.S.)

<sup>2</sup> Faculty of Science, Energy, and Environment, King Mongkut's University of Technology North Bangkok (Rayong Campus), Rayong, 21120, Thailand; susira.b@sciee.kmutnb.ac.th

\* Correspondence: tippawan.prapamontol@cmu.ac.th

**Table S1.** Basic information about each sampling site of the Mae Chaem River.

| Site Number | Type              | Latitude | Longitude | Attitude (m) | Major anthropogenic activity of the site                                |
|-------------|-------------------|----------|-----------|--------------|-------------------------------------------------------------------------|
| S1          | Agricultural area | 18.6789  | 98.3425   | 513          | Agricultural activities                                                 |
| S2          | Community area    | 18.6813  | 98.3389   | 516          | Village area                                                            |
| S3          | Community area    | 18.6839  | 98.3760   | 520          | Village area                                                            |
| S4          | Agricultural area | 18.6656  | 98.3825   | 448          | Agricultural activities                                                 |
| S5          | Agricultural area | 18.6445  | 98.3767   | 472          | Agricultural runoff and Village area                                    |
| S6          | Community area    | 18.6416  | 98.3767   | 517          | Village area                                                            |
| S7          | Community area    | 18.5523  | 98.3944   | 556          | Village area                                                            |
| S8          | Agricultural area | 18.5466  | 98.3829   | 512          | Agricultural activities                                                 |
| S9          | Agricultural area | 18.5408  | 98.3524   | 454          | Agricultural activities                                                 |
| S10         | Community area    | 18.5411  | 98.3512   | 456          | Village area                                                            |
| S11         | Agricultural area | 18.5123  | 98.3561   | 412          | Agricultural runoff and Village area                                    |
| S12         | Community area    | 18.5111  | 98.3539   | 441          | Village area                                                            |
| S13         | Agricultural area | 18.4985  | 98.3615   | 436          | Agricultural runoff and residential area (sub-urban)                    |
| S14         | Community area    | 18.4943  | 98.3596   | 438          | Commercial and residential area, downtown of Mae Chaem district (Urban) |
| S15         | Agricultural area | 18.4927  | 98.3630   | 432          | Agricultural runoff and Village area                                    |
| S16         | Community area    | 18.4883  | 98.3666   | 441          | Village area                                                            |
| S17         | Community area    | 18.4817  | 98.3703   | 426          | Village area                                                            |
| S18         | Agricultural area | 18.4802  | 98.3700   | 410          | Agricultural runoff and Village area                                    |
| S19         | Agricultural area | 18.4302  | 98.3837   | 514          | Agricultural activities                                                 |
| S20         | Community area    | 18.2765  | 98.3854   | 324          | Village area                                                            |

**Table S2.** Precision and accuracy data based on the extraction of the urban dust SRM1648a.

| Metals | R <sup>2</sup> | LOD<br>(µg/L) | SRM1648a (n = 3)          |              |          |
|--------|----------------|---------------|---------------------------|--------------|----------|
|        |                |               | *ref. std                 | % Rec.       | % R.S.D. |
|        |                |               | conc. mg Kg <sup>-1</sup> |              |          |
| As     | 0.99996        | 1.59          | 115.5 ± 3.9               | 117.4 ± 1.64 | 1.39     |
| Cd     | 0.99985        | 0.74          | 73.7 ± 2.3                | 110.0 ± 2.59 | 2.35     |
| Cr     | 0.99990        | 0.87          | 402 ± 13                  | 48.7 ± 0.01  | 0.02     |
| Ni     | 0.99975        | 1.13          | 81.1 ± 6.8                | 101.4 ± 1.21 | 1.19     |
| Pb     | 0.99990        | 1.22          | 0.655 ± 0.033             | 105.7 ± 2.01 | 1.91     |
| Cu     | 0.99994        | 1.19          | 610 ± 70                  | 94.6 ± 2.32  | 2.45     |
| Zn     | 0.99990        | 2.61          | 4800 ± 270                | 91.1 ± 1.01  | 1.11     |

Furthermore, the authors used Urban Particulate Matter as a reference material, it would have been more appropriate to use a standard sediment reference material.

**Table S3.** Concentration categories are based on a geo-accumulation index ( $I_{geo}$ ) and contamination factor (CF).

| $I_{geo}$ |        |                                   |       | CF                 |                        |
|-----------|--------|-----------------------------------|-------|--------------------|------------------------|
| Class     | Values | Classification                    | Level | Value              | Classification         |
| 0         | <0     | Unpolluted                        | 1     | CF < 1             | Low pollution          |
| 1         | 0-1    | Unpolluted to moderately polluted | 2     | $1 \leq CF \leq 3$ | Moderate pollution     |
| 2         | 1-2    | Moderately polluted               | 3     | $3 \leq CF \leq 6$ | Considerable pollution |
| 3         | 2-3    | Moderately to strongly polluted   | 4     | CF > 6             | Very high pollution    |
| 4         | 3-4    | Strongly to extremely polluted    |       |                    |                        |
| 5         | >4     | Extremely polluted                |       |                    |                        |

**Table S4** Parameters of the average daily intake (ADD) for metals.

| Parameters                                | Exposed group                                                                                    |                                                                                                   |
|-------------------------------------------|--------------------------------------------------------------------------------------------------|---------------------------------------------------------------------------------------------------|
|                                           | Children                                                                                         | Adult                                                                                             |
| Intake rate (IR)                          | 200 mg/day                                                                                       | 100 mg/day                                                                                        |
| Exposure frequency (EF)                   | 350 days/year                                                                                    | 350 days/year                                                                                     |
| Exposure duration (ED)                    | 6 years                                                                                          | 24 years                                                                                          |
| Averaging time (AT)<br>AT = ED × 365 days | 70 × 365 = 25,550 days<br>(Carcinogenic risk)<br>6 × 365 = 2,190 days<br>(non-carcinogenic risk) | 70 × 365 = 25,550 days<br>(Carcinogenic risk)<br>24 × 365 = 8,760 days<br>(Non-carcinogenic risk) |
| Bodyweight (BW)                           | 15 kg                                                                                            | 70 kg                                                                                             |

**Table S5** Reference dose (RfD) and the cancer slope factor (CSF<sub>oral</sub>) for elements.

| Elements        | RfD (mg/Kg <sup>-1</sup> day <sup>-1</sup> ) | CSF <sub>oral</sub> (mg/ Kg <sup>-1</sup> day <sup>-1</sup> ) <sup>1</sup> |
|-----------------|----------------------------------------------|----------------------------------------------------------------------------|
| As              | 0.0003                                       | 1.5                                                                        |
| Cd              | 0.001                                        | 6.3                                                                        |
| Cr <sup>1</sup> | 0.003                                        | 0.5                                                                        |
| Ni              | 0.011                                        | 9.0×10 <sup>-5</sup>                                                       |
| Pb              | 0.0035                                       | 0.0085                                                                     |
| Cu              | 0.04                                         | -                                                                          |
| Zn              | 0.3                                          | -                                                                          |

<sup>1</sup> CSF of Cr is represented by Hexavalent chromium (Cr (VI)), which has been classified to relate human cancer.

**Table S6** The index of geo-accumulation represents the heavy metal concentration in surface sediments.

| Site | Igeo Value |       |       |       |       |       |       |
|------|------------|-------|-------|-------|-------|-------|-------|
|      | As         | Cd    | Cr    | Cu    | Ni    | Pb    | Zn    |
| S1   | 3.47       | -0.18 | -1.75 | -2.15 | -2.37 | 0.34  | -1.27 |
| S2   | 3.33       | 0.47  | -1.36 | -1.17 | -1.64 | 0.36  | -0.64 |
| S3   | 3.92       | 0.40  | -2.01 | -1.67 | -2.26 | 0.61  | -1.05 |
| S4   | 5.14       | 0.21  | -1.98 | -1.20 | -1.92 | 1.07  | -0.85 |
| S5   | 2.39       | -0.09 | -2.46 | -2.88 | -3.05 | 0.41  | -1.13 |
| S6   | 2.56       | -0.17 | -2.39 | -2.72 | -3.03 | 0.47  | -1.07 |
| S7   | 4.12       | 0.08  | -1.72 | -2.20 | -2.38 | 1.20  | 0.15  |
| S8   | 4.45       | -0.09 | -2.31 | -1.94 | -2.37 | 0.83  | -0.91 |
| S9   | 3.30       | -0.17 | -1.78 | -2.57 | -2.41 | 0.18  | -1.31 |
| S10  | 3.49       | 0.52  | -1.21 | -1.56 | -1.56 | 0.75  | -0.41 |
| S11  | 3.38       | 0.20  | -1.78 | -2.24 | -2.40 | 0.10  | -1.13 |
| S12  | 2.60       | -0.60 | -2.11 | -3.24 | -2.92 | -0.64 | -1.52 |
| S13  | 3.85       | 0.40  | -1.49 | -1.73 | -2.02 | 0.61  | -0.70 |
| S14  | 2.76       | 0.21  | -1.08 | -1.93 | -2.12 | 0.45  | -0.28 |
| S15  | 3.55       | 0.07  | -1.60 | -1.90 | -2.16 | 0.36  | -0.89 |
| S16  | 3.24       | 0.08  | -1.48 | -1.67 | -2.05 | 0.53  | -0.57 |
| S17  | 3.61       | 0.15  | -1.33 | -1.93 | -2.04 | 0.41  | -0.87 |
| S18  | 3.22       | 0.28  | -1.72 | -1.61 | -2.28 | 0.43  | -0.65 |
| S19  | 3.09       | 0.62  | -1.57 | -1.54 | -1.98 | 1.10  | -0.36 |
| S20  | 3.15       | -0.48 | -2.00 | -2.25 | -2.73 | 0.07  | -1.45 |
